# Supplementary material for: A new physically-based quantification of marine isoprene and primary organic aerosol emissions
Source: Copernicus journal article supplement (doi:10.5194/acp-9-4915-2009), 2009-07-24
Supplement: Supplementary file 1 [file acp-9-4915-2009-supplement.pdf]

## Auxiliary material

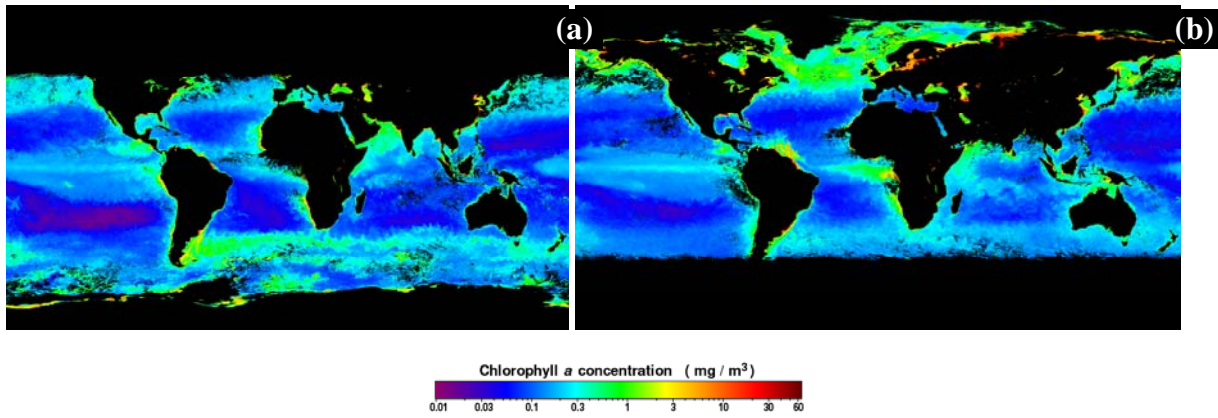

Figure S1. Chlorophyll-*a* concentrations for a) January and b) July, 2001 from SeaWiFS (<http://oceancolor.gsfc.nasa.gov/cgi/13>).

(a)

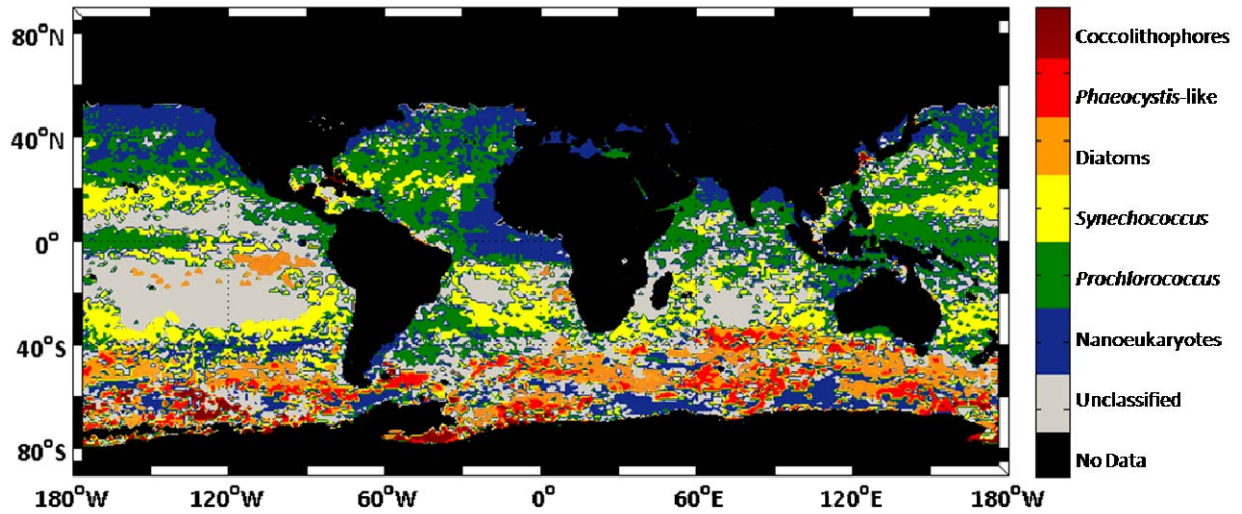

(b)

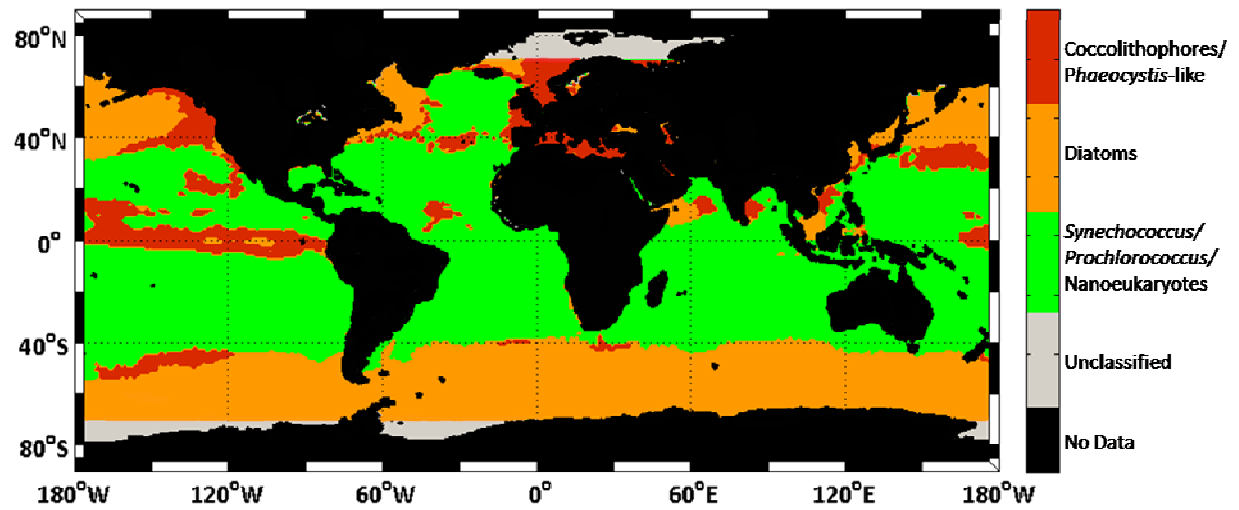

Figure S2. Dominant phytoplankton groups for January 2001 adapted from a) PHYSAT (Alvain et al., 2005; Alvain et al., 2008) and b) the NDT method (Kamykowski et al., 2002).

(a)

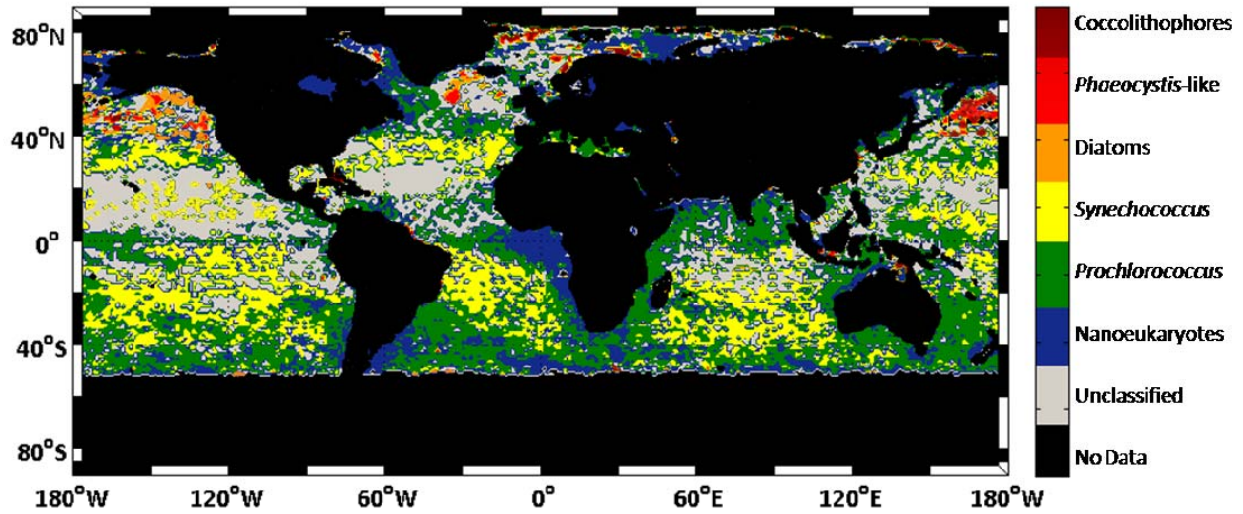

(b)

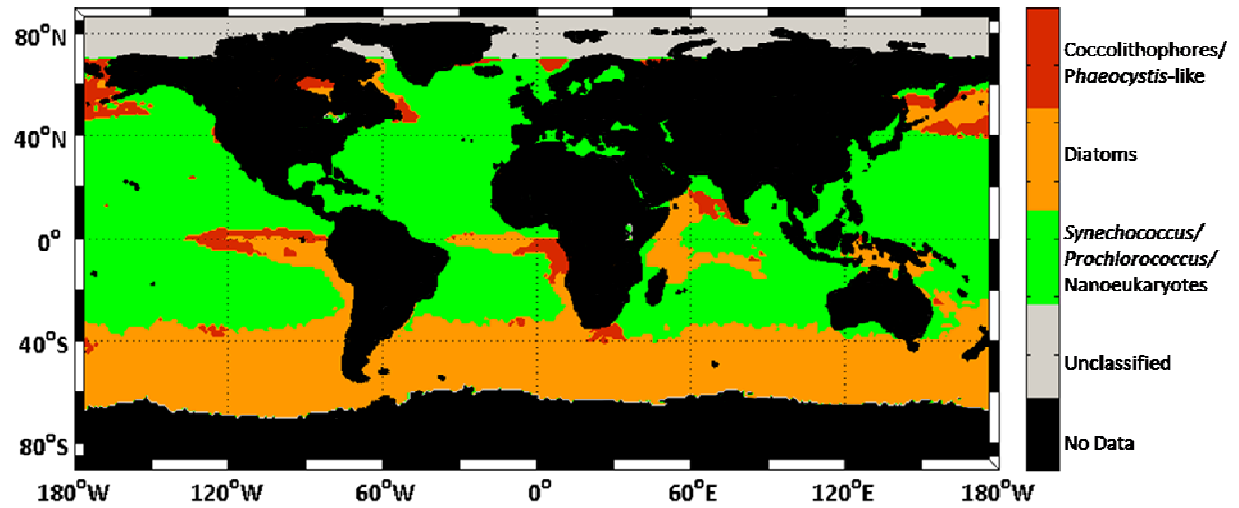

Figure S3. Dominant phytoplankton groups for July 2001 adapted from a) PHYSAT (Alvain et al., 2005; Alvain et al., 2008) and b) the NDT method (Kamykowski et al., 2002).
